# Supplementary material for: A pH stable fluoran-triphenylamine photosensitizer with efficient type I and type II ROS generation
Source: Royal Society of Chemistry journal article supplement (doi:10.1039/d4ob02060j), 2025-01-01
Supplement: d4ob02060j1.pdf [file d4ob02060j1.pdf]

## Supplementary information materials for

### A pH stable fluoran-triphenylamine photosensitizer with efficient type I and type II ROS generation

Yinuo Gu,<sup>‡</sup><sup>a</sup> Bo Li,<sup>‡</sup><sup>a</sup> Shuao Zhang,<sup>a</sup> Shuhong Bao,<sup>a</sup> Wenjie Yang,<sup>a</sup> Wei Yang,<sup>a</sup> Hongdian Lu,<sup>a</sup> Chunxiang Wei,<sup>a</sup> Man-Bo Li,<sup>\*b</sup> San-E Zhu<sup>\*a</sup>

<sup>a</sup> School of Energy, Materials and Chemical Engineering, Hefei University, Hefei, 230601, China. E-mail: zhuse@hfu.edu.cn

<sup>b</sup> Institutes of Physical Science and Information Technology, Anhui University, Hefei, 230601, China. E-mail: mbli@ahu.edu.cn

#### Table of Contents

|                                                                                                                      |         |
|----------------------------------------------------------------------------------------------------------------------|---------|
| 1. Photophysical properties of <b>FI-TPA</b> in different solvents.....                                              | S2      |
| 2. The fluorescence emission spectra of <b>FI-TPA</b> and <b>FI-H</b> were measured at different concentrations..... | S2      |
| 3. <sup>1</sup> H NMR, <sup>13</sup> C NMR and high-resolution mass spectrometry (HRMS).....                         | S3-S13  |
| 4. Nanosecond time-resolved transient absorption spectra of compound <b>FI-TPA</b> .....                             | S14-S15 |
| 5. The effect of ROS indicators on the excited state of <b>FI-TPA</b> .....                                          | S16     |
| 6. Reactive oxygen species (ROS) generation of indocyanine green (ICG) and control group.....                        | S16-S17 |
| 7. Compound <b>5</b> in its acid-induced ring-opened form pH stability.....                                          | S18     |
| 8. Theoretical calculation.....                                                                                      | S19-S30 |

1. Photophysical properties of **FI-TPA** in different solvents

**Table S1** Photophysical properties of **FI-TPA** in different solvents

| Solvents             | $\lambda_{\max}$ (nm) | $\lambda_{\text{em}}$ (nm) | Stokes shift ( $\text{cm}^{-1}$ ) | $\epsilon^a$ ( $\text{M}^{-1}\text{cm}^{-1}$ ) |
|----------------------|-----------------------|----------------------------|-----------------------------------|------------------------------------------------|
| $\text{CHCl}_3$      | 502                   | 575                        | 2529                              | $2.46 \times 10^4$                             |
| DMF                  | 505                   | 592                        | 2910                              | $2.70 \times 10^4$                             |
| THF                  | 505                   | 590                        | 2853                              | $2.30 \times 10^4$                             |
| Toluene              | 505                   | 600                        | 3135                              | $2.30 \times 10^4$                             |
| $\text{H}_2\text{O}$ | 507                   | 586                        | 2659                              | $2.12 \times 10^4$                             |

<sup>a</sup> The molar extinction coefficient was determined at the maximum absorption wavelength ( $\lambda_{\max}$ ) in DMF solution.

2. The fluorescence emission spectra of **FI-TPA** and **FI-H** at different concentrations.

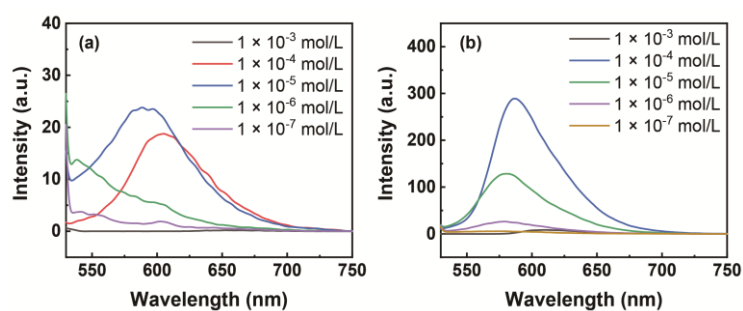

**Fig. S1** The fluorescence emission spectra of (a) **FI-TPA** and (b) **FI-H** measured at different concentrations in DMF solution.

3.  $^1\text{H}$  NMR,  $^{13}\text{C}$  NMR and HRMS

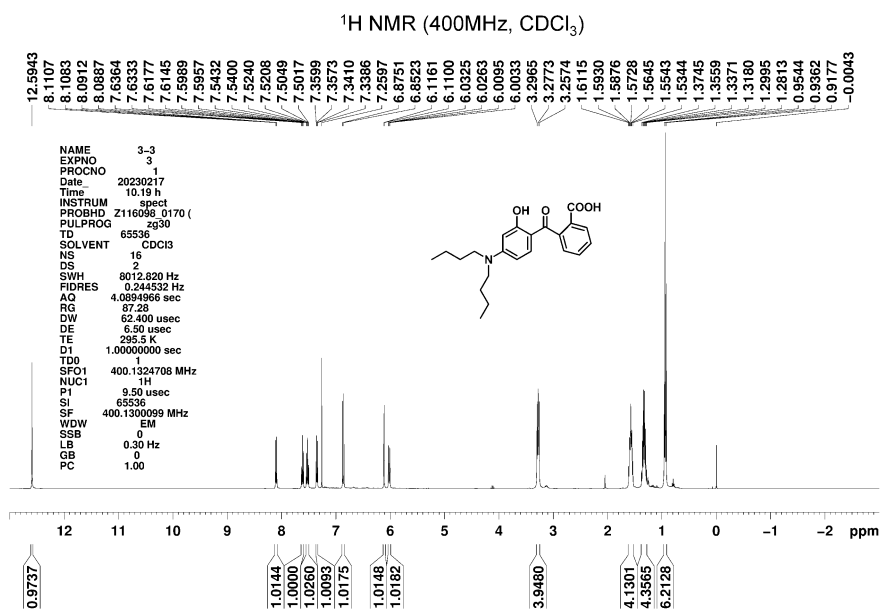

Fig. S2  $^1\text{H}$  NMR (400 MHz) spectrum of **3** ( $\text{CDCl}_3$ ).

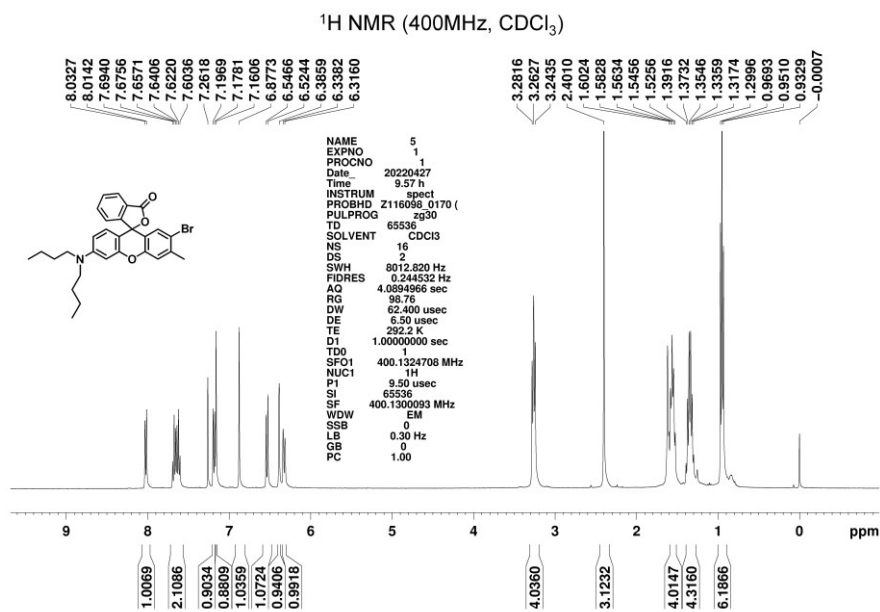

Fig. S3  $^1\text{H}$  NMR (400 MHz) spectrum of **5** ( $\text{CDCl}_3$ ).

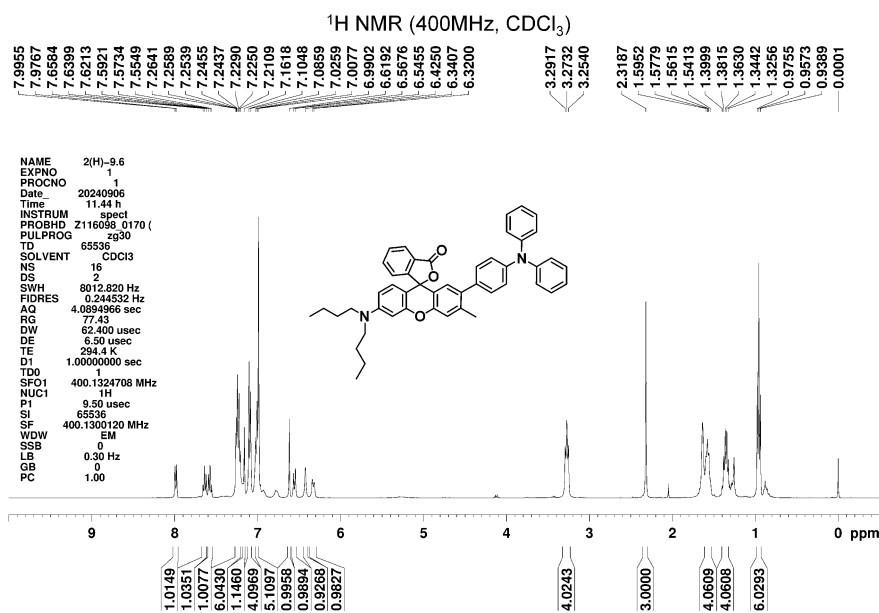

Fig. S4 <sup>1</sup>H NMR (400 MHz) spectrum of 7 (CDCl<sub>3</sub>).

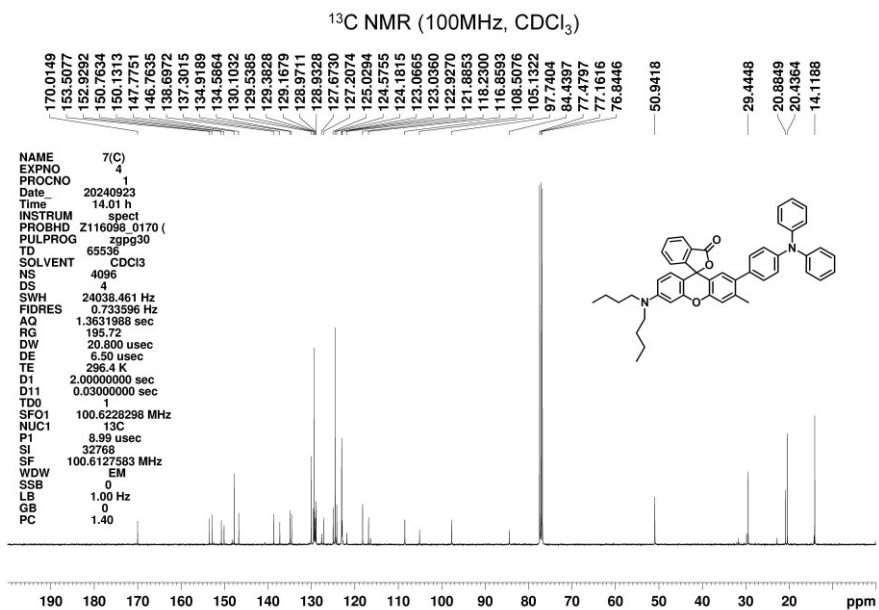

Fig. S5 <sup>13</sup>C NMR (100 MHz) spectrum of 7 (CDCl<sub>3</sub>).

Comment 1  
Comment 2

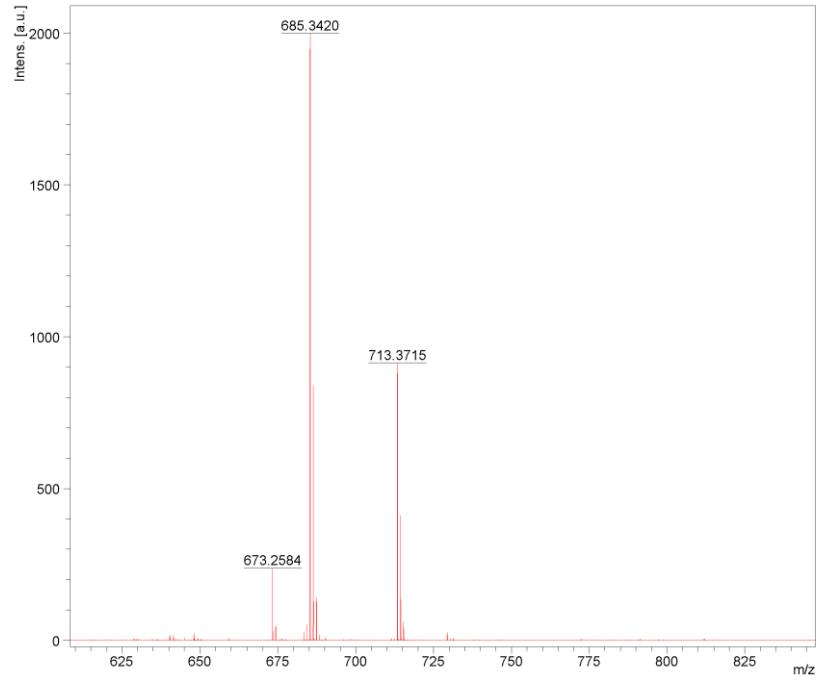

**Acquisition Parameter**

Date of acquisition 2024-08-08T18:04:16.543+08:00  
Acquisition method name D:\Methods\flexControlMethods\Service\_20240513\_PM\RP\_700-3500\_Da.par  
Acquisition operation mode Reflector  
Voltage polarity POS  
Number of shots 500  
Name of spectrum used for calibration  
Calibration reference list used sample

**Instrument Info**

User BDAL@CN  
Instrument FLEX-PC  
Instrument type ultraflexTOF/TOF

Fig. S6 HRMS spectrum of 7.

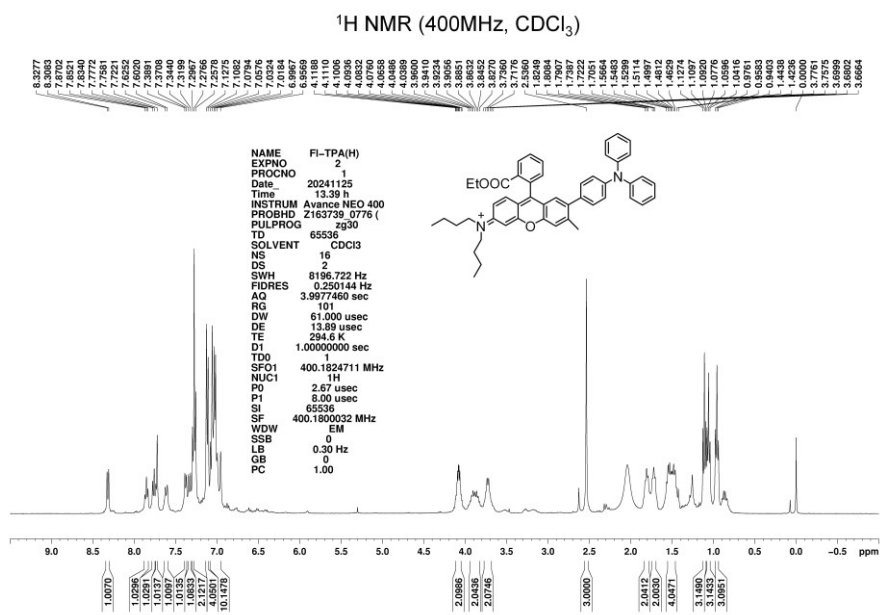

Fig. S7 <sup>1</sup>H NMR (400 MHz) spectrum of FI-TPA (CDCl<sub>3</sub>).

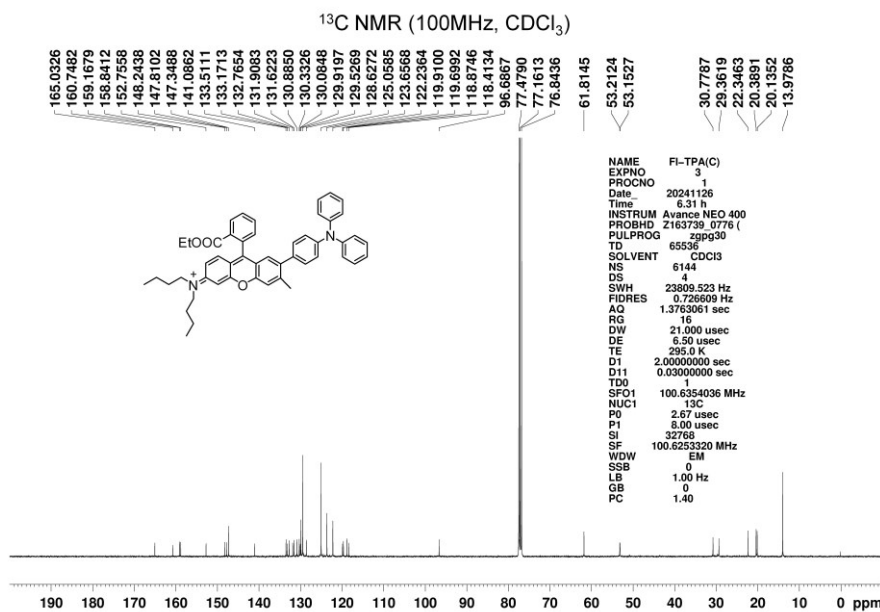

Fig. S8 <sup>13</sup>C NMR (100 MHz) spectrum of FI-TPA (CDCl<sub>3</sub>).

Comment 1  
Comment 2

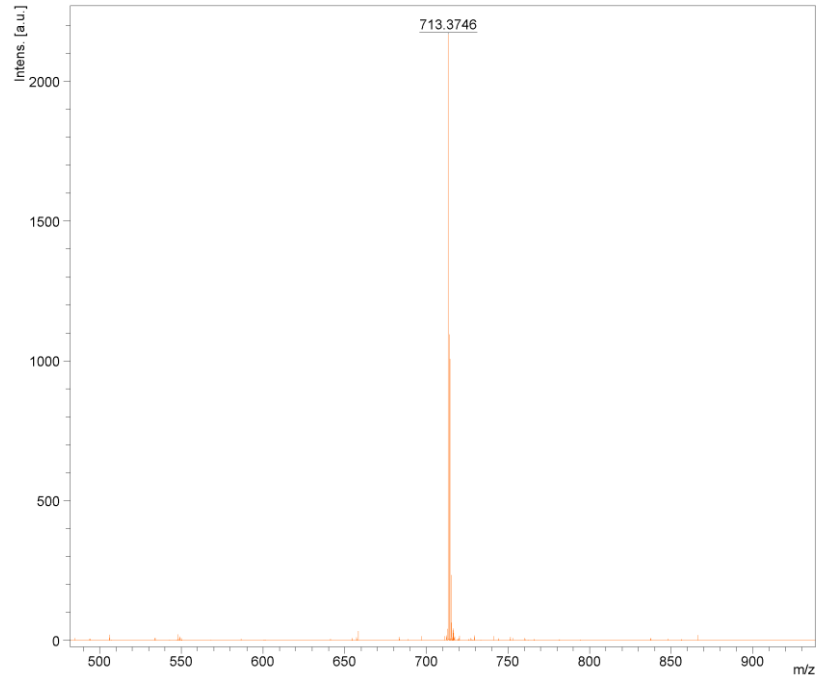

**Acquisition Parameter**

Date of acquisition 2024-08-03T12:13:40.075+08:00  
Acquisition method name D:\Methods\flexControlMethods\Service\_20240513\_PM\RP\_700-3500\_Da.par  
Acquisition operation mode Reflector  
Voltage polarity POS  
Number of shots 500  
Name of spectrum used for calibration  
Calibration reference list used sample

**Instrument Info**

User BDAL@CN  
Instrument FLEX-PC  
Instrument type ultraflexTOF/TOF

**Fig. S9** HRMS spectrum of FI-TPA.

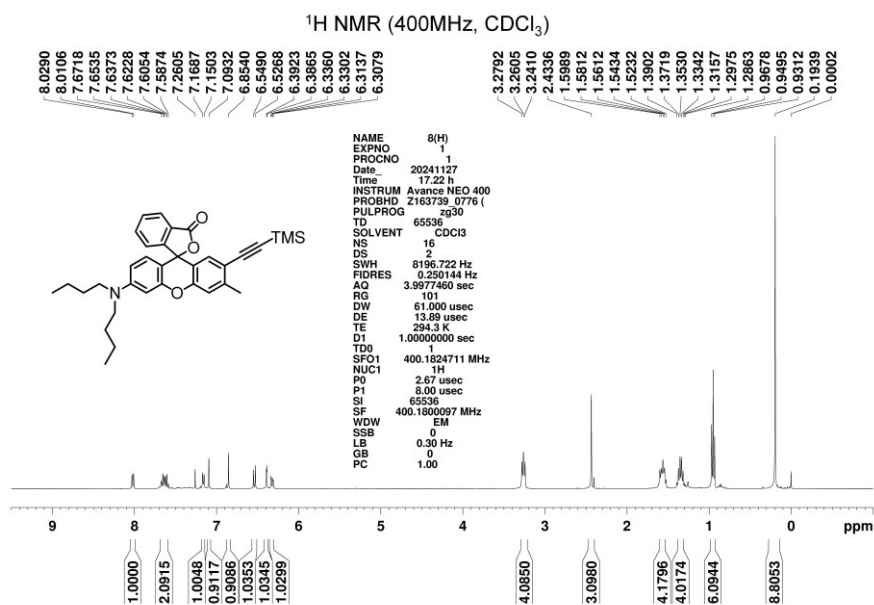

Fig. S10 <sup>1</sup>H NMR (400 MHz) spectrum of **8** (CDCl<sub>3</sub>).

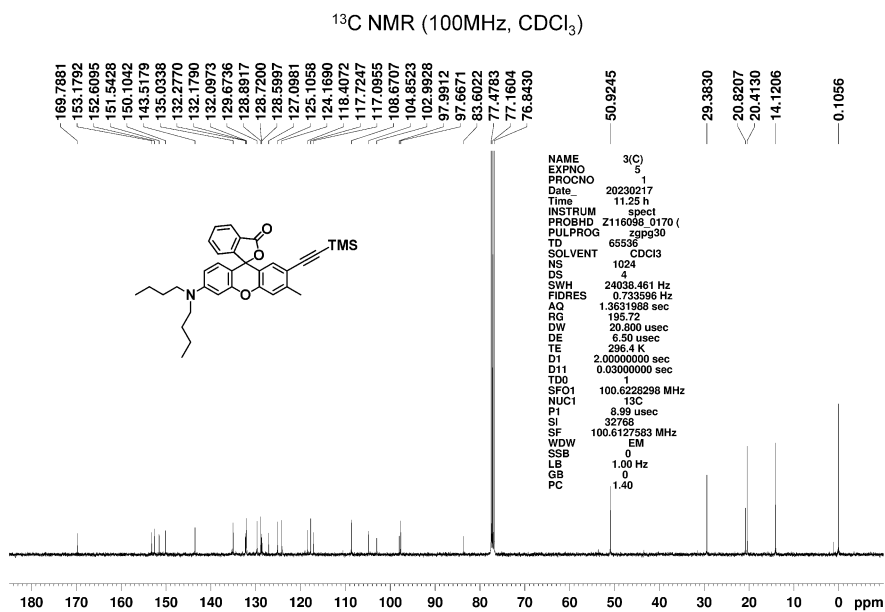

Fig. S11 <sup>13</sup>C NMR (100 MHz) spectrum of **8** (CDCl<sub>3</sub>).



Comment 1  
Comment 2

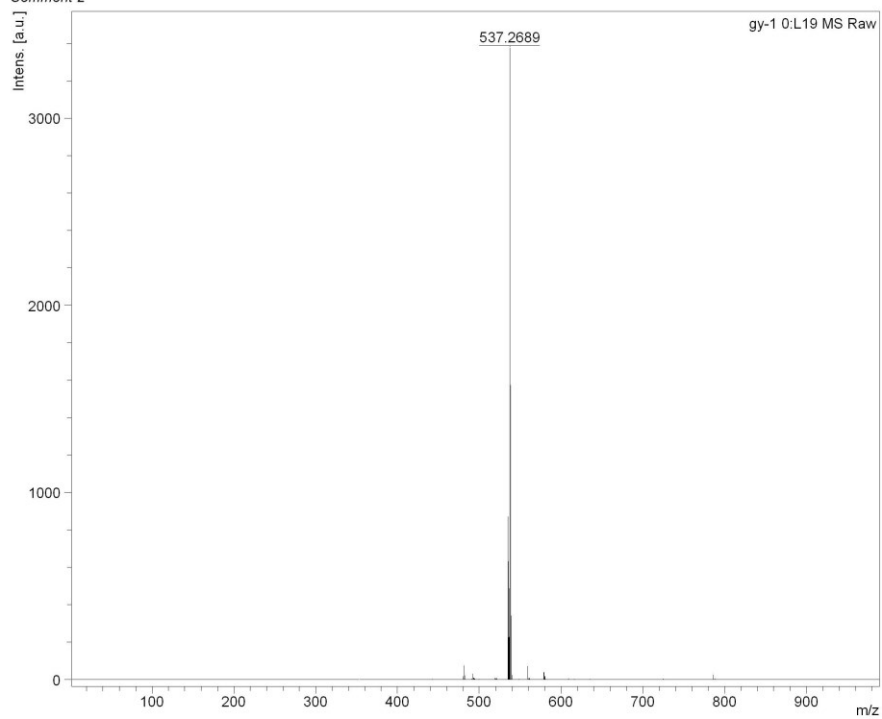

**Acquisition Parameter**

Date of acquisition  
Acquisition method name  
  
Acquisition operation mode  
Voltage polarity  
Number of shots  
Name of spectrum used for calibration  
Calibration reference list used

**Instrument Info**

Bruker Daltonics flexAnalysis

printed: 2/24/2023 7:30:10 PM

**Fig. S12** HRMS spectrum of **8**.

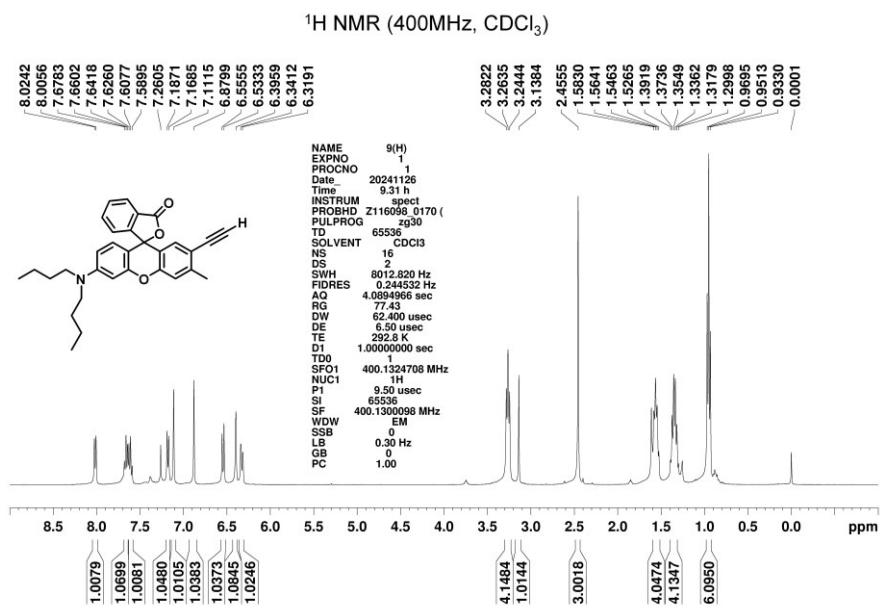

Fig. S13 <sup>1</sup>H NMR (400 MHz) spectrum of 9 (CDCl<sub>3</sub>).

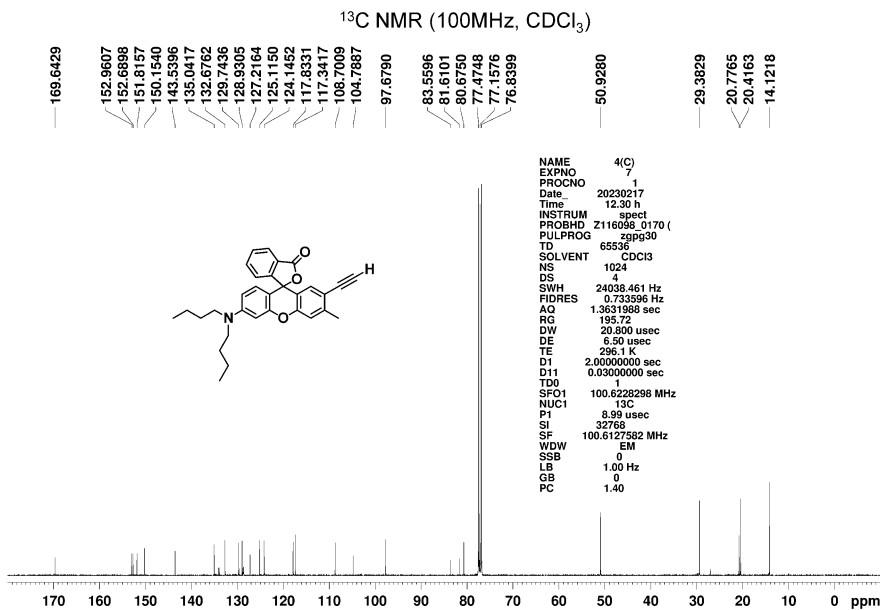

Fig. S14 <sup>13</sup>C NMR (100 MHz) spectrum of 9 (CDCl<sub>3</sub>).

Comment 1  
Comment 2

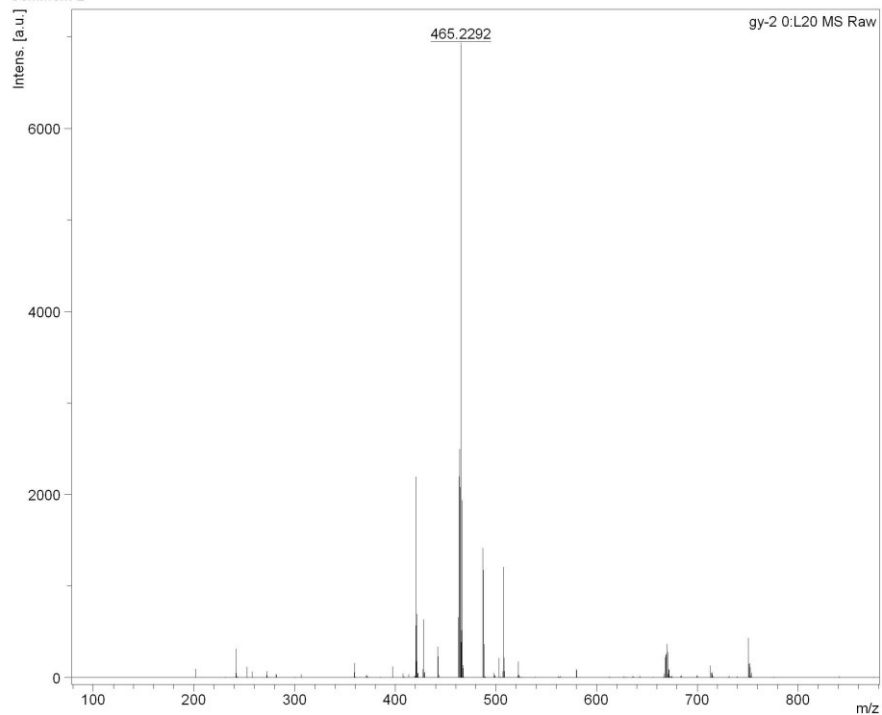

**Acquisition Parameter**

|                                       |                                                              |
|---------------------------------------|--------------------------------------------------------------|
| Date of acquisition                   | 2023-02-24T16:13:22.714+08:00                                |
| Acquisition method name               | D:\Methods\flexControlMethods\gc-RP_700-3500_Da-20210416.par |
| Acquisition operation mode            | Reflector                                                    |
| Voltage polarity                      | POS                                                          |
| Number of shots                       | 500                                                          |
| Name of spectrum used for calibration |                                                              |
| Calibration reference list used       | sample                                                       |

**Instrument Info**

Bruker Daltonics flexAnalysis

printed: 2/24/2023 7:28:20 PM

Fig. S15 HRMS spectrum of 9.

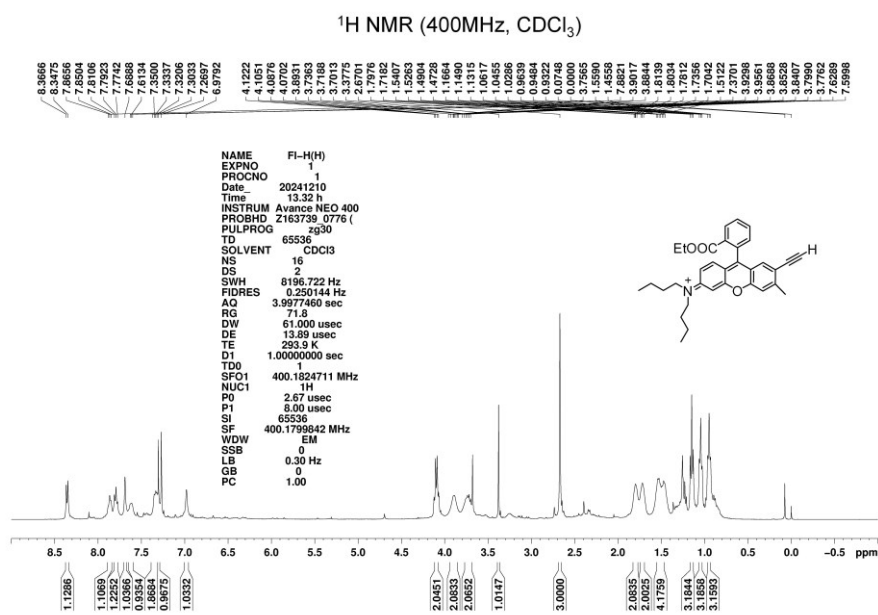

Fig. S16 <sup>1</sup>H NMR (400 MHz) spectrum of FI-H (CDCl<sub>3</sub>).

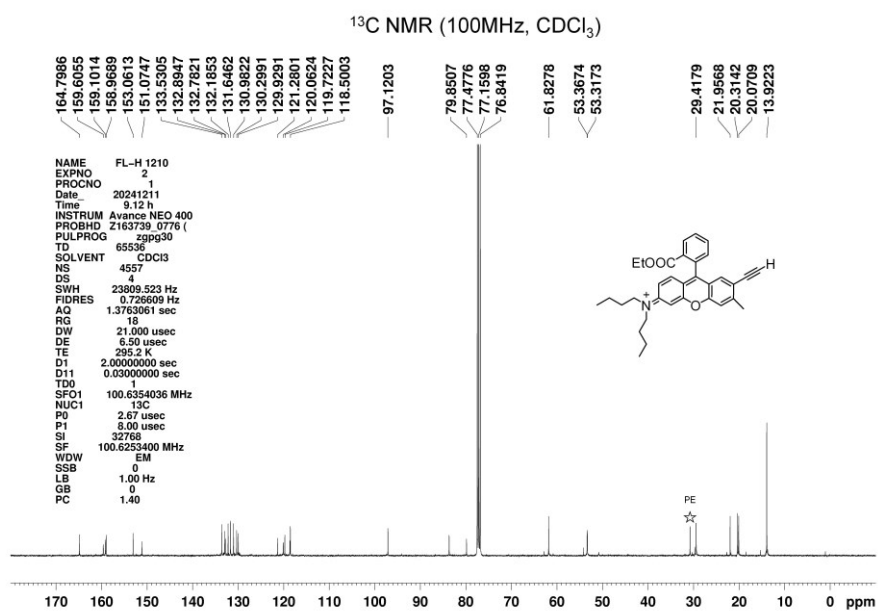

Fig. S17 <sup>13</sup>C NMR (100 MHz) spectrum of FI-H (CDCl<sub>3</sub>).

FL\_H\_pos #75-96 RT: 0.39-0.49 AV: 22 NL: 3.27E9  
T: FTMS + p ESI Full ms [100.0000-1500.0000]

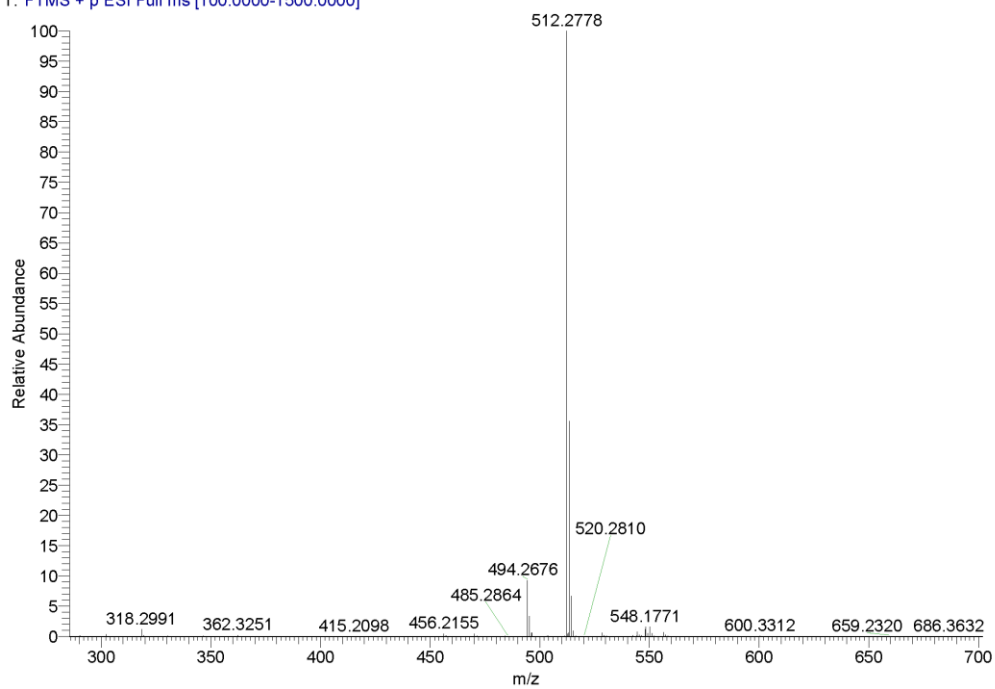

Fig. S18 HRMS spectrum of FI-H.

#### 4. Nanosecond time-resolved transient absorption spectra of compound FI-TPA

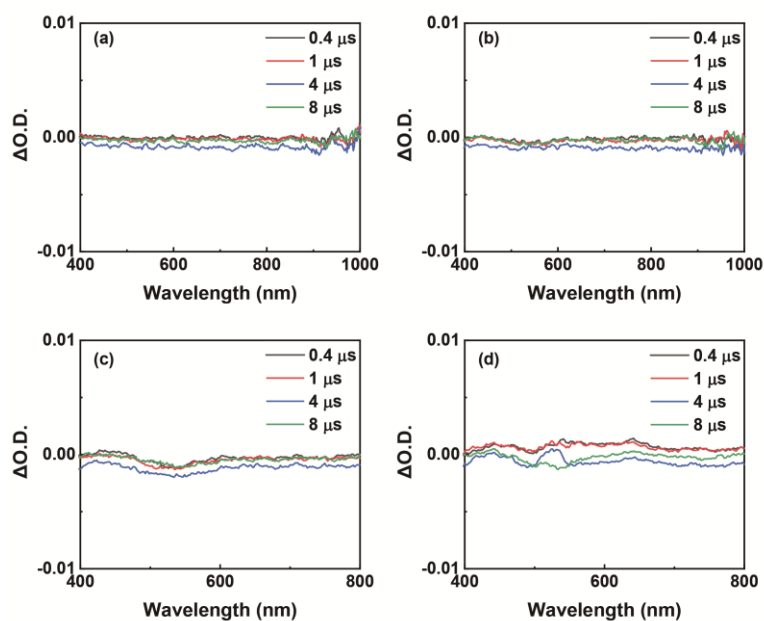

**Fig. S19** The nanosecond transient absorption spectra of FI-TPA in DMF at concentrations of  $1 \times 10^{-5}$  mol/L (a)  $5 \times 10^{-5}$  mol/L (b) were recorded in the range of 400-1000 nm, with excitation at 532 nm. (c) The nanosecond transient absorption spectra of FI-TPA in DMF at concentrations of  $1 \times 10^{-4}$  mol/L were recorded in the range of 400-800 nm, with excitation at 532 nm. (d) The nanosecond transient absorption spectra of FI-TPA in DMF at concentrations of  $1 \times 10^{-4}$  mol/L were recorded in the range of 400-800 nm, with excitation at 355 nm.

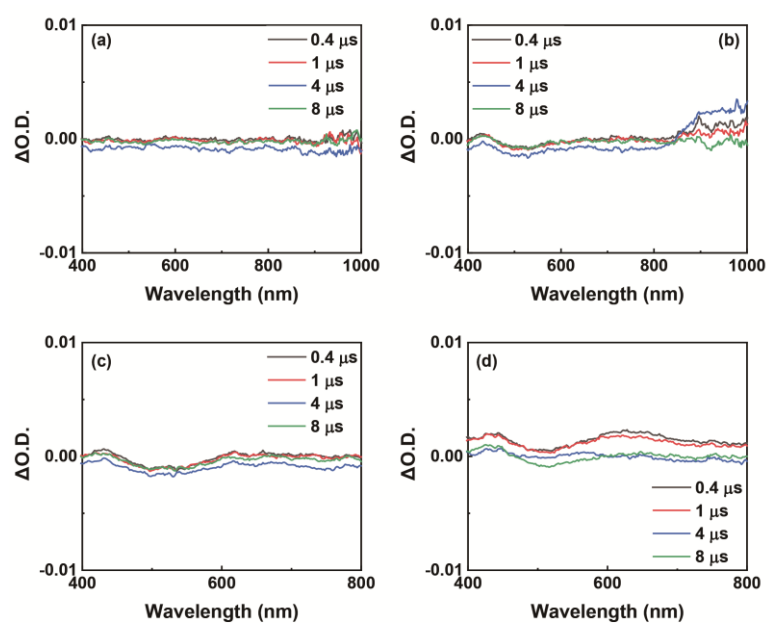

**Fig. S20** The nanosecond transient absorption spectra of FI-TPA in Tol at concentrations of  $1 \times 10^{-5}$  mol/L (a)  $5 \times 10^{-5}$  mol/L (b) were recorded in the range of 400-1000 nm, with excitation at 532 nm. (c) The nanosecond

transient absorption spectra of **FI-TPA** in Tol at concentrations of  $1 \times 10^{-4}$  mol/L were recorded in the range of 400-800 nm, with excitation at 532 nm. (d) The nanosecond transient absorption spectra of **FI-TPA** in Tol at concentrations of  $1 \times 10^{-4}$  mol/L were recorded in the range of 400-800 nm, with excitation at 355 nm.

5. The effect of ROS indicators on the excited state of FI-TPA.

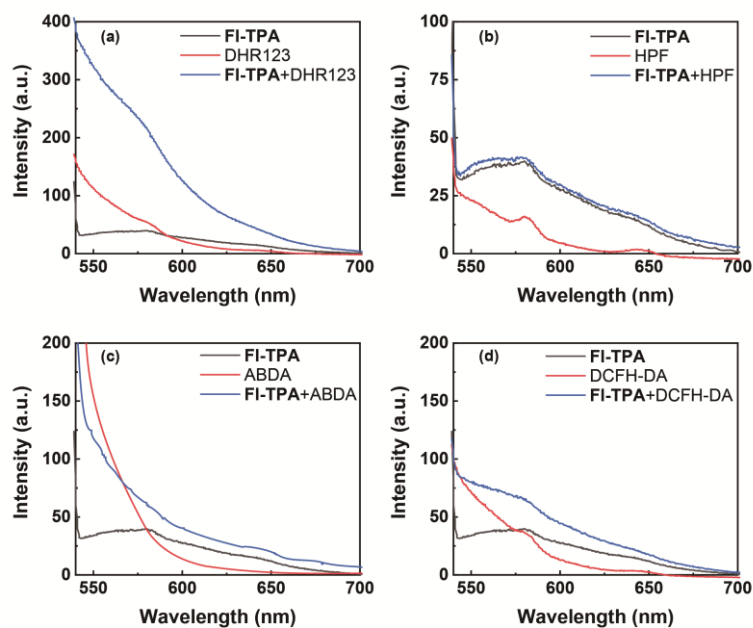

**Fig. S21** Under 530 nm excitation, the fluorescence emission spectra of (a) DHR123 (b) HPF (c) ABDA (d) DCFH-DA and FI-TPA were recorded individually and in combination in aqueous solutions at a concentration of  $1 \times 10^{-5}$  mol/L.

6. ROS generation of ICG and control group

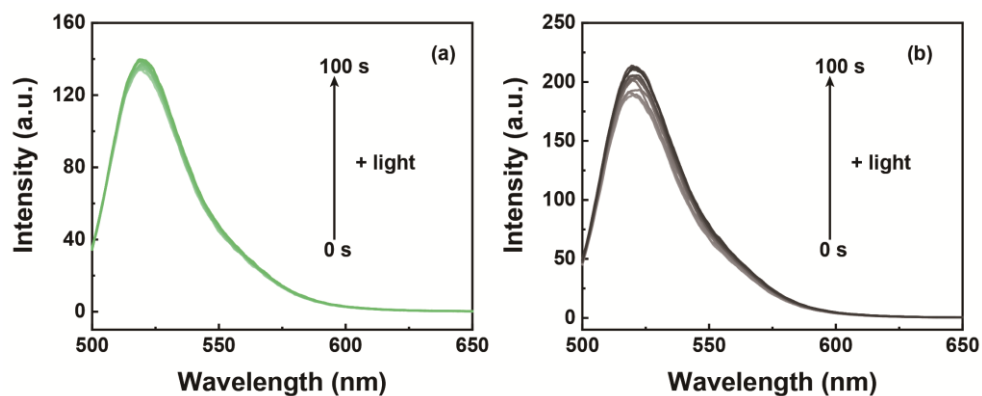

**Fig. S22** The fluorescence emission spectra of DHR123 were recorded under 100 s illumination with (a) ICG, (b) control (without test solution), at a light intensity of  $10 \text{ mW/cm}^2$ . The concentrations of PSs and DHR123 during the measurements are  $1 \times 10^{-5}$  mol/L each.



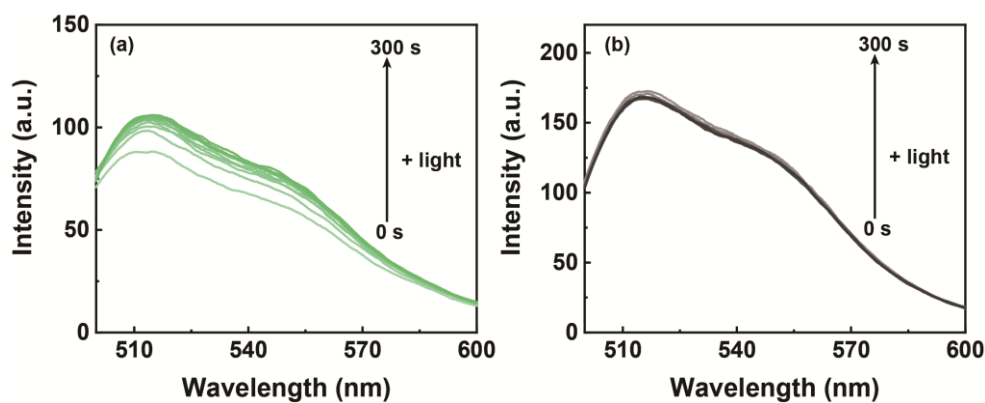

**Fig. S23** The fluorescence emission spectra of HPF were recorded under 300 s illumination with (a) ICG, (b) control (without test solution), at a light intensity of 10 mW/cm<sup>2</sup>. The concentrations of PSs and HPF during the measurements are  $1 \times 10^{-5}$  mol/L each.

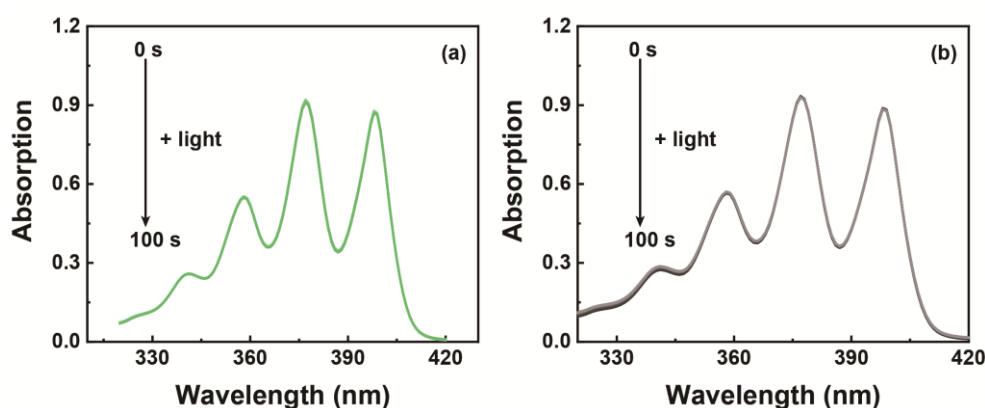

**Fig. S24** The UV-vis absorption spectra showing the changes in ABDA were recorded under 100 s illumination with (a) ICG, (b) control (without test solution), at a light intensity of 10 mW/cm<sup>2</sup>. The concentrations of PSs and ABDA during the measurements are  $1 \times 10^{-5}$  mol/L each.

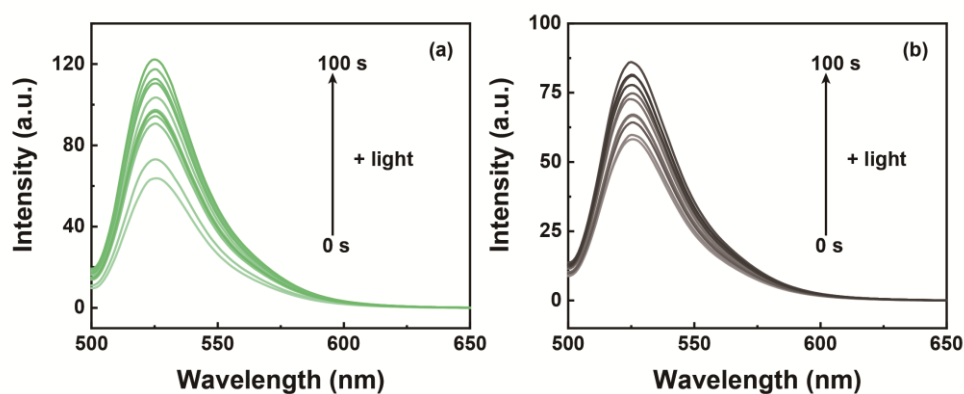

**Fig. S25** The fluorescence emission spectra of DCFH-DA were recorded under 100 s illumination with (a) ICG, (b) control (without test solution), at a light intensity of 10 mW/cm<sup>2</sup>. The concentrations of PSs and DCFH-DA during the measurements are  $1 \times 10^{-5}$  mol/L each.

7. Compound **5** in its acid-induced ring-opened form pH stability

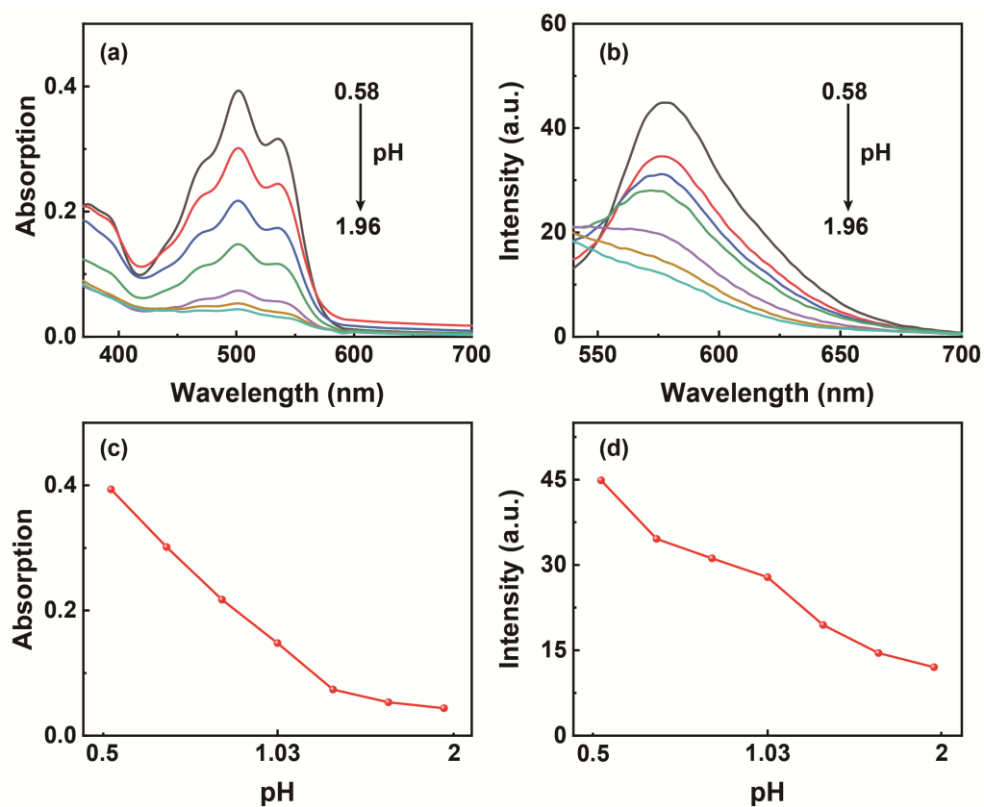

**Fig. S26** (a) The UV-vis absorption spectra and (b) fluorescence emission spectra of compound **5** in its acid-induced ring-opened form at different pH values ( $\lambda_{\text{ex}} = 500$  nm). (c) Changes in the UV-vis absorption intensity at 502 nm and (d) changes in the fluorescence emission intensity at 577 nm for compound **5** in its acid-induced ring-opened form at different pH values.

## 8. Theoretical calculation

The optimized structure of  $S_0$  state of **FI-TPA**

|   |              |             |             |
|---|--------------|-------------|-------------|
| C | 3.42392300   | -1.11254300 | 0.85726800  |
| C | 4.78740600   | -0.92132000 | 1.02900400  |
| C | 5.64407700   | -0.86048800 | -0.07655700 |
| C | 5.08561600   | -0.98907800 | -1.35490300 |
| C | 3.72069800   | -1.17335100 | -1.51672500 |
| N | 7.03535100   | -0.67384700 | 0.09234100  |
| C | 7.76536600   | 0.13722700  | -0.81935800 |
| C | 7.71746300   | -1.30206800 | 1.17013500  |
| C | 9.00140200   | -0.29100500 | -1.31538200 |
| C | 9.71966100   | 0.50830200  | -2.19695400 |
| C | 9.21298000   | 1.73796700  | -2.60984800 |
| C | 7.97960400   | 2.16421600  | -2.12306500 |
| C | 7.26311000   | 1.37704600  | -1.22940800 |
| C | 8.65848500   | -0.59121900 | 1.92284200  |
| C | 9.33453700   | -1.20997300 | 2.96787900  |
| C | 9.07445500   | -2.53970800 | 3.28961400  |
| C | 8.13353900   | -3.24827400 | 2.54634200  |
| C | 7.46504600   | -2.64058200 | 1.49025000  |
| C | -4.12084700  | 1.07581200  | 0.85335600  |
| C | -5.44348700  | 0.83595400  | 0.67691500  |
| C | -5.91257300  | -0.30240500 | -0.07695200 |
| C | -4.93026200  | -1.17706400 | -0.60341600 |
| C | -3.59590400  | -0.91726600 | -0.41346400 |
| C | -3.11678300  | 0.21343800  | 0.31595200  |
| O | -2.72469300  | -1.79936200 | -0.95607900 |
| N | -7.22818300  | -0.52220400 | -0.27136600 |
| C | -1.75021200  | 0.41787700  | 0.45396600  |
| C | -0.85276300  | -0.53937500 | -0.10690800 |
| C | -1.38507700  | -1.63474900 | -0.80892500 |
| C | -0.56717100  | -2.60154400 | -1.37506500 |
| C | 0.81378000   | -2.50943800 | -1.27210200 |
| C | 1.38836500   | -1.40435300 | -0.57644300 |
| C | 0.55170300   | -0.46026600 | -0.00970800 |
| C | -0.85957700  | 2.79748600  | 0.75145600  |
| C | -1.22338200  | 1.54502400  | 1.27875800  |
| C | -0.37154700  | 3.78733000  | 1.61031000  |
| C | -0.23918600  | 3.54917700  | 2.97047700  |
| C | -0.59821600  | 2.31143700  | 3.49081900  |
| C | -1.08697200  | 1.31876300  | 2.64907000  |
| C | 1.65724300   | -3.60126200 | -1.87211500 |
| C | -7.64619200  | -1.73478800 | -1.01530900 |
| C | -9.12354600  | -1.82868600 | -1.38281600 |
| C | -9.39702500  | -3.10656600 | -2.18479400 |
| C | -10.86804900 | -3.25090000 | -2.57595400 |
| C | -8.24964800  | 0.30942700  | 0.38531900  |
| C | -8.56909200  | -0.13107700 | 1.81775500  |
| C | -9.65003400  | 0.74213100  | 2.45917900  |
| C | -9.98447400  | 0.31703800  | 3.88967900  |
| C | 2.85967000   | -1.24407100 | -0.41632300 |
| C | -0.99743300  | 3.06225900  | -0.71102400 |
| O | -1.39314700  | 2.23876300  | -1.51200600 |
| O | -0.63821000  | 4.30418000  | -1.04878800 |
| C | -0.28818100  | 6.09085100  | -2.60449400 |
| C | -0.73654600  | 4.65509400  | -2.45824000 |

|   |              |             |             |
|---|--------------|-------------|-------------|
| H | 2.78607900   | -1.15986800 | 1.73218700  |
| H | 5.19119900   | -0.82058900 | 2.02802200  |
| H | 5.72448800   | -0.94139700 | -2.22708700 |
| H | 3.32258300   | -1.25559000 | -2.52060400 |
| H | 9.39743700   | -1.25066100 | -1.00805600 |
| H | 10.67496300  | 0.16051500  | -2.57217200 |
| H | 9.77206800   | 2.35632600  | -3.30126200 |
| H | 7.57652900   | 3.12250900  | -2.42898600 |
| H | 6.31131800   | 1.72208900  | -0.84556400 |
| H | 8.85894200   | 0.44614400  | 1.68630100  |
| H | 10.05953600  | -0.64401500 | 3.54095400  |
| H | 9.59853300   | -3.01777600 | 4.10802200  |
| H | 7.92686600   | -4.28624100 | 2.77932900  |
| H | 6.74512900   | -3.20308200 | 0.90927500  |
| H | -3.81162200  | 1.94295700  | 1.42070300  |
| H | -6.14937700  | 1.52032600  | 1.11869900  |
| H | -5.19048800  | -2.06534900 | -1.15511500 |
| H | -1.02802000  | -3.43762000 | -1.88559500 |
| H | 0.98544400   | 0.37819600  | 0.51838500  |
| H | -0.09618600  | 4.74803500  | 1.19960100  |
| H | 0.14147500   | 4.32669700  | 3.62048400  |
| H | -0.50072300  | 2.11359800  | 4.55099700  |
| H | -1.36608100  | 0.35573400  | 3.05818000  |
| H | 1.05837800   | -4.49352600 | -2.05257800 |
| H | 2.08363900   | -3.29050400 | -2.82955500 |
| H | 2.49180200   | -3.86231300 | -1.22028800 |
| H | -7.06837100  | -1.76433500 | -1.94104100 |
| H | -7.36330000  | -2.61618600 | -0.42937000 |
| H | -9.74932800  | -1.83438100 | -0.48659100 |
| H | -9.41912200  | -0.96180700 | -1.98118200 |
| H | -8.77656700  | -3.10853600 | -3.08699000 |
| H | -9.08817300  | -3.97655500 | -1.59587400 |
| H | -11.03485700 | -4.16749000 | -3.14597700 |
| H | -11.51000300 | -3.28650700 | -1.69163900 |
| H | -11.19689400 | -2.41004900 | -3.19258100 |
| H | -7.92689200  | 1.34894100  | 0.36453700  |
| H | -9.14845100  | 0.27088400  | -0.22331500 |
| H | -8.89528700  | -1.17604900 | 1.80917100  |
| H | -7.65742800  | -0.09562200 | 2.42266200  |
| H | -9.32008600  | 1.78663900  | 2.45596000  |
| H | -10.55639100 | 0.70473500  | 1.84535000  |
| H | -10.75769500 | 0.95701300  | 4.32063000  |
| H | -10.34917900 | -0.71329600 | 3.91968900  |
| H | -9.10384200  | 0.37713500  | 4.53497400  |
| H | -0.35093200  | 6.38107600  | -3.65514700 |
| H | -0.92429100  | 6.76272100  | -2.02576900 |
| H | 0.74524000   | 6.21565900  | -2.27675200 |
| H | -0.10668700  | 3.96863000  | -3.02459900 |
| H | -1.77084700  | 4.51388900  | -2.77282200 |

The optimized structure of S<sub>1</sub> state of **FI-TPA**

|   |              |             |             |
|---|--------------|-------------|-------------|
| C | 3.91007700   | -2.05560800 | 0.64863800  |
| C | 5.26093400   | -1.79720800 | 0.74125700  |
| C | 5.82055300   | -0.72003200 | 0.02869900  |
| C | 4.98859900   | 0.08329600  | -0.77328900 |
| C | 3.64066000   | -0.19366100 | -0.85777400 |
| N | 7.18944000   | -0.44870600 | 0.11861900  |
| C | 7.65561500   | 0.88711200  | 0.08891700  |
| C | 8.12096700   | -1.50751000 | 0.24088100  |
| C | 8.80413600   | 1.20790100  | -0.64865700 |
| C | 9.25334300   | 2.51713200  | -0.67574900 |
| C | 8.57524100   | 3.50835600  | 0.03326200  |
| C | 7.43803900   | 3.18598700  | 0.77186300  |
| C | 6.97181200   | 1.88219000  | 0.80222000  |
| C | 9.20272000   | -1.38501100 | 1.12423000  |
| C | 10.10945600  | -2.42494800 | 1.24015500  |
| C | 9.95411600   | -3.58181000 | 0.47717300  |
| C | 8.88187300   | -3.69849200 | -0.40573600 |
| C | 7.96238700   | -2.66989200 | -0.52709600 |
| C | -3.98126300  | 1.13675700  | 0.55912900  |
| C | -5.31676800  | 0.81477000  | 0.46742500  |
| C | -5.74496500  | -0.47508700 | 0.05697700  |
| C | -4.72605100  | -1.41906600 | -0.20553600 |
| C | -3.39469800  | -1.07272200 | -0.10808300 |
| C | -2.94885700  | 0.21673100  | 0.26128700  |
| O | -2.50041600  | -2.08150300 | -0.37836800 |
| N | -7.08022200  | -0.79010000 | -0.09590200 |
| C | -1.55528800  | 0.48978900  | 0.34175600  |
| C | -0.64934400  | -0.57180600 | 0.05223400  |
| C | -1.15221900  | -1.84281500 | -0.30048700 |
| C | -0.32091400  | -2.90497300 | -0.60298100 |
| C | 1.07001000   | -2.78068600 | -0.56688900 |
| C | 1.60618400   | -1.51861600 | -0.22888800 |
| C | 0.75594100   | -0.45174200 | 0.05145900  |
| C | -1.17712300  | 2.98640600  | -0.01975400 |
| C | -1.05791300  | 1.82229000  | 0.76710900  |
| C | -0.74905100  | 4.21990100  | 0.48319500  |
| C | -0.17817400  | 4.31624600  | 1.74416500  |
| C | -0.04591700  | 3.17242900  | 2.52430500  |
| C | -0.48747200  | 1.94731500  | 2.03924500  |
| C | 1.91891800   | -3.97388100 | -0.92960600 |
| C | -7.43814700  | -2.17354600 | -0.44511800 |
| C | -8.88149500  | -2.38624200 | -0.89790100 |
| C | -9.09288200  | -3.81375100 | -1.41354800 |
| C | -10.53540500 | -4.08008100 | -1.84547200 |
| C | -8.10428600  | 0.05988200  | 0.51756400  |
| C | -8.28405200  | -0.15035500 | 2.02609700  |
| C | -9.35987500  | 0.76368500  | 2.61690800  |
| C | -9.55837800  | 0.56138000  | 4.11990100  |
| C | 3.06784100   | -1.26647900 | -0.15316000 |
| C | -1.69153300  | 2.92452700  | -1.42231700 |
| O | -1.51447000  | 1.99799500  | -2.18493700 |
| O | -2.35545800  | 4.04073200  | -1.76212500 |
| C | -3.52691500  | 5.45962500  | -3.29459100 |
| C | -2.83602500  | 4.12481700  | -3.13171200 |
| H | 3.49003800   | -2.86062900 | 1.23615600  |
| H | 5.88386400   | -2.39095300 | 1.39562200  |

|   |              |             |             |
|---|--------------|-------------|-------------|
| H | 5.41532800   | 0.88818100  | -1.35539900 |
| H | 3.01789600   | 0.41092900  | -1.50391900 |
| H | 9.31411000   | 0.43976300  | -1.21385700 |
| H | 10.12879300  | 2.76911400  | -1.26001200 |
| H | 8.93402100   | 4.52938100  | 0.01144800  |
| H | 6.92094300   | 3.95097900  | 1.33634600  |
| H | 6.10593900   | 1.62200300  | 1.39565500  |
| H | 9.30713500   | -0.49455600 | 1.72903200  |
| H | 10.93452400  | -2.33865700 | 1.93521500  |
| H | 10.66863900  | -4.38971100 | 0.56933100  |
| H | 8.76976400   | -4.58868300 | -1.01094300 |
| H | 7.14412900   | -2.74446900 | -1.23036700 |
| H | -3.71424700  | 2.13466100  | 0.88156300  |
| H | -6.03713300  | 1.57733600  | 0.71955400  |
| H | -4.94835800  | -2.43919700 | -0.47602000 |
| H | -0.77515300  | -3.84716800 | -0.88594100 |
| H | 1.18806600   | 0.50852100  | 0.29921400  |
| H | -0.85173100  | 5.10320700  | -0.13242600 |
| H | 0.15953100   | 5.27630700  | 2.11418500  |
| H | 0.39074600   | 3.23328500  | 3.51394100  |
| H | -0.40490100  | 1.06394200  | 2.66090700  |
| H | 1.35414800   | -4.66242600 | -1.55943000 |
| H | 2.82150000   | -3.68545000 | -1.47005700 |
| H | 2.23544500   | -4.53396700 | -0.04440800 |
| H | -6.79207700  | -2.47909700 | -1.26981300 |
| H | -7.21963800  | -2.84921100 | 0.39416000  |
| H | -9.57960100  | -2.20447200 | -0.07606000 |
| H | -9.12838500  | -1.67398300 | -1.69212300 |
| H | -8.41893500  | -3.99786800 | -2.25693300 |
| H | -8.80892400  | -4.52674700 | -0.63190700 |
| H | -10.65611700 | -5.10235900 | -2.21122200 |
| H | -11.22922800 | -3.94033800 | -1.01190200 |
| H | -10.83879700 | -3.40128500 | -2.64735700 |
| H | -7.86921600  | 1.10368400  | 0.30984100  |
| H | -9.04671100  | -0.12856500 | 0.00741000  |
| H | -8.54796600  | -1.19652100 | 2.21577100  |
| H | -7.33046700  | 0.02705900  | 2.53397700  |
| H | -9.09284900  | 1.80831400  | 2.42171600  |
| H | -10.30857900 | 0.58898000  | 2.09724900  |
| H | -10.33089800 | 1.22738400  | 4.51159700  |
| H | -9.85984000  | -0.46595900 | 4.34258700  |
| H | -8.63479700  | 0.76249500  | 4.66985400  |
| H | -3.90107600  | 5.54964200  | -4.31640900 |
| H | -4.37355100  | 5.54995100  | -2.61176500 |
| H | -2.83732700  | 6.28507100  | -3.10929800 |
| H | -1.98190400  | 4.02129800  | -3.80190800 |
| H | -3.51439200  | 3.28960200  | -3.30867000 |

The optimized structure of T<sub>1</sub> state of **FI-TPA**

|   |             |             |             |
|---|-------------|-------------|-------------|
| C | -3.58084400 | -0.51296100 | -0.99994100 |
| C | -4.92907600 | -0.25219300 | -1.06360100 |
| C | -5.79876100 | -0.77873500 | -0.08421200 |
| C | -5.26033100 | -1.57864900 | 0.94616800  |
| C | -3.91318600 | -1.85551800 | 0.97538700  |
| N | -7.16220800 | -0.51064000 | -0.13249400 |
| C | -7.92126100 | -0.40259200 | 1.06404800  |
| C | -7.82176900 | -0.33901000 | -1.37924200 |
| C | -9.18034600 | -1.01002500 | 1.14505100  |
| C | -9.91751600 | -0.89972600 | 2.31335700  |
| C | -9.41493400 | -0.18117100 | 3.39726700  |
| C | -8.16547800 | 0.42973100  | 3.31011300  |
| C | -7.41438300 | 0.32230300  | 2.14994500  |
| C | -8.75148100 | 0.69635900  | -1.53674800 |
| C | -9.39407900 | 0.85752100  | -2.75393100 |
| C | -9.12536300 | -0.01008700 | -3.81170800 |
| C | -8.20645300 | -1.04503100 | -3.64879300 |
| C | -7.55157600 | -1.21432300 | -2.43882000 |
| C | 3.98643100  | 1.20204700  | -0.52334500 |
| C | 5.32586700  | 0.89823000  | -0.41560200 |
| C | 5.76682500  | -0.39802300 | -0.04236400 |
| C | 4.75724000  | -1.36704800 | 0.16667700  |
| C | 3.42397000  | -1.03618100 | 0.05307900  |
| C | 2.96462300  | 0.25561900  | -0.28055400 |
| O | 2.53823700  | -2.07010500 | 0.27395500  |
| N | 7.10321500  | -0.69983900 | 0.12548900  |
| C | 1.56560100  | 0.51028700  | -0.38064100 |
| C | 0.67135100  | -0.57963700 | -0.15663800 |
| C | 1.19430900  | -1.85314200 | 0.17169600  |
| C | 0.37504400  | -2.94408300 | 0.40298800  |
| C | -1.01542300 | -2.84541600 | 0.35851400  |
| C | -1.57928200 | -1.57804000 | 0.05739100  |
| C | -0.72953100 | -0.49281000 | -0.20669700 |
| C | 1.10629000  | 2.97497700  | 0.08732000  |
| C | 1.05577400  | 1.85205800  | -0.76398300 |
| C | 0.66819800  | 4.22194400  | -0.37155600 |
| C | 0.15643100  | 4.37044000  | -1.65283800 |
| C | 0.09435700  | 3.26721000  | -2.49721500 |
| C | 0.54564000  | 2.02920300  | -2.05492700 |
| C | -1.82202000 | -4.10271800 | 0.57343700  |
| C | 7.47677600  | -2.08835500 | 0.43668000  |
| C | 8.91330400  | -2.29306500 | 0.91433300  |
| C | 9.13703900  | -3.73399300 | 1.38564900  |
| C | 10.57397200 | -3.99183900 | 1.84073400  |
| C | 8.12657600  | 0.18802600  | -0.43252000 |
| C | 8.34415900  | 0.03295700  | -1.94308800 |
| C | 9.41751700  | 0.98408200  | -2.47708000 |
| C | 9.65313700  | 0.83653200  | -3.98111300 |
| C | -3.02909000 | -1.33214200 | 0.00908300  |
| C | 1.56300600  | 2.85056200  | 1.50554800  |
| O | 1.40000400  | 1.87076100  | 2.20191300  |
| O | 2.15814500  | 3.97188300  | 1.94139600  |
| C | 3.20951500  | 5.33689000  | 3.60452500  |
| C | 2.57787600  | 3.99040200  | 3.33341100  |
| H | -2.93218200 | -0.08871700 | -1.75489900 |
| H | -5.32031500 | 0.38354000  | -1.84536300 |

|   |              |             |             |
|---|--------------|-------------|-------------|
| H | -5.91310500  | -1.99980900 | 1.69772100  |
| H | -3.53097900  | -2.47133400 | 1.77633500  |
| H | -9.56014000  | -1.57936400 | 0.30732000  |
| H | -10.88379800 | -1.38285800 | 2.38202300  |
| H | -9.99729800  | -0.09492300 | 4.30591700  |
| H | -7.78007800  | 1.00260800  | 4.14384300  |
| H | -6.45533300  | 0.81640800  | 2.06953100  |
| H | -8.94589600  | 1.37663500  | -0.71846400 |
| H | -10.10072400 | 1.66766600  | -2.88106800 |
| H | -9.63354000  | 0.11810800  | -4.75909400 |
| H | -8.00877500  | -1.73074900 | -4.46275100 |
| H | -6.85696300  | -2.03208900 | -2.30032000 |
| H | 3.70885300   | 2.20711400  | -0.81433400 |
| H | 6.03821600   | 1.68107100  | -0.62572900 |
| H | 4.99006000   | -2.39249200 | 0.40710100  |
| H | 0.84357300   | -3.89831600 | 0.61254300  |
| H | -1.17005900  | 0.47211300  | -0.41637500 |
| H | 0.71673300   | 5.07382600  | 0.29299100  |
| H | -0.19016900  | 5.33986300  | -1.98870700 |
| H | -0.29574800  | 3.36968200  | -3.50274200 |
| H | 0.51711500   | 1.17828300  | -2.72490900 |
| H | -1.22766400  | -4.97668600 | 0.30439400  |
| H | -2.11421000  | -4.22590800 | 1.62067400  |
| H | -2.73309500  | -4.11743400 | -0.02492700 |
| H | 6.81793300   | -2.43229700 | 1.23574600  |
| H | 7.28842500   | -2.73830700 | -0.42988900 |
| H | 9.62598300   | -2.07199700 | 0.11499200  |
| H | 9.13066100   | -1.60480100 | 1.73777300  |
| H | 8.44788000   | -3.95772400 | 2.20685600  |
| H | 8.88237500   | -4.42405100 | 0.57394000  |
| H | 10.70359700  | -5.02403400 | 2.17413500  |
| H | 11.28356400  | -3.81250600 | 1.02829800  |
| H | 10.84818100  | -3.33626400 | 2.67190300  |
| H | 7.86856700   | 1.21990600  | -0.19450600 |
| H | 9.06010200   | -0.00317200 | 0.09277600  |
| H | 8.63004100   | -1.00168500 | -2.16174400 |
| H | 7.39944900   | 0.21231500  | -2.46651900 |
| H | 9.12847200   | 2.01690300  | -2.25284000 |
| H | 10.35701900  | 0.80684800  | -1.94184800 |
| H | 10.42271000  | 1.52819400  | -4.33201200 |
| H | 9.97716300   | -0.17748200 | -4.23142400 |
| H | 8.73882600   | 1.04118900  | -4.54504900 |
| H | 3.53610000   | 5.37866600  | 4.64558300  |
| H | 4.08039100   | 5.49816400  | 2.96674300  |
| H | 2.49737700   | 6.14686100  | 3.43710600  |
| H | 1.70105000   | 3.81610100  | 3.95812700  |
| H | 3.27965900   | 3.17079000  | 3.49060600  |



The optimized structure of S<sub>0</sub> state of **FI-H**

|   |             |             |             |
|---|-------------|-------------|-------------|
| C | -0.68280800 | -1.25787600 | -0.42836000 |
| C | -2.01596300 | -1.23143500 | -0.18768000 |
| C | -2.70278600 | -0.00369700 | 0.13859900  |
| C | -1.92547100 | 1.18179100  | 0.17526400  |
| C | -0.57766400 | 1.13382100  | -0.07128100 |
| C | 0.11800900  | -0.07492800 | -0.38386000 |
| O | 0.09135700  | 2.31035600  | -0.00942000 |
| N | -4.02409900 | 0.01313200  | 0.39546100  |
| C | 1.48590900  | -0.04630300 | -0.60903900 |
| C | 2.16258700  | 1.21232600  | -0.56225900 |
| C | 1.42272400  | 2.36872800  | -0.25515400 |
| C | 2.01492000  | 3.62451700  | -0.18854900 |
| C | 3.36943000  | 3.77530800  | -0.42879600 |
| C | 4.14298300  | 2.61901100  | -0.74684800 |
| C | 3.53848200  | 1.37386100  | -0.80850700 |
| C | 2.90743200  | -2.11405500 | -0.11586100 |
| C | 2.22416200  | -1.27755100 | -1.01728600 |
| C | 3.57584500  | -3.24265600 | -0.60008000 |
| C | 3.57598200  | -3.54461400 | -1.95407500 |
| C | 2.90122800  | -2.71765600 | -2.84416700 |
| C | 2.23017600  | -1.59334100 | -2.37658600 |
| C | 4.01176800  | 5.12830900  | -0.35945200 |
| C | -4.68127400 | 1.31332500  | 0.67588600  |
| C | -6.12871700 | 1.25191000  | 1.15275100  |
| C | -6.65900700 | 2.66139000  | 1.44096700  |
| C | -8.10994500 | 2.65512300  | 1.92315000  |
| C | -4.85151700 | -1.19426100 | 0.23466300  |
| C | -5.31237900 | -1.43071200 | -1.20743800 |
| C | -6.18133900 | -2.68431200 | -1.33361000 |
| C | -6.65404900 | -2.93596200 | -2.76611800 |
| C | 5.54261100  | 2.73793100  | -1.00444300 |
| C | 6.72088800  | 2.84037000  | -1.22166700 |
| C | 2.90983200  | -1.79708400 | 1.34264800  |
| O | 2.35916700  | -0.82577300 | 1.82226400  |
| O | 3.58278000  | -2.69488500 | 2.06725300  |
| C | 4.44624500  | -3.59257500 | 4.11281200  |
| C | 3.64217700  | -2.46712700 | 3.50414100  |
| H | -0.20624000 | -2.19917900 | -0.66513600 |
| H | -2.56380300 | -2.15761100 | -0.24777800 |
| H | -2.35989600 | 2.14509400  | 0.38591200  |
| H | 1.39631700  | 4.47913100  | 0.05306900  |
| H | 4.13629500  | 0.50688800  | -1.05244700 |
| H | 4.09614100  | -3.88294900 | 0.09761200  |

|   |             |             |             |
|---|-------------|-------------|-------------|
| H | 4.09956500  | -4.42205900 | -2.31166100 |
| H | 2.89298600  | -2.94343300 | -3.90318900 |
| H | 1.70531100  | -0.95160100 | -3.07315500 |
| H | 3.28398100  | 5.89801800  | -0.10757600 |
| H | 4.80723800  | 5.14045900  | 0.39004200  |
| H | 4.47598100  | 5.38537900  | -1.31500500 |
| H | -4.09487500 | 1.81515600  | 1.44776300  |
| H | -4.62397700 | 1.93067700  | -0.22708800 |
| H | -6.76802000 | 0.78163500  | 0.40107900  |
| H | -6.20031600 | 0.65100100  | 2.06408600  |
| H | -6.02511900 | 3.14053800  | 2.19429400  |
| H | -6.57714500 | 3.27125000  | 0.53521300  |
| H | -8.46239800 | 3.66974700  | 2.12105400  |
| H | -8.77265000 | 2.21165200  | 1.17513100  |
| H | -8.21671300 | 2.07889300  | 2.84616800  |
| H | -4.29915600 | -2.05417300 | 0.60946800  |
| H | -5.71311300 | -1.09328600 | 0.88810400  |
| H | -5.87204100 | -0.55643300 | -1.55497700 |
| H | -4.43823800 | -1.51940200 | -1.86038700 |
| H | -5.61694000 | -3.55277100 | -0.97708700 |
| H | -7.04998400 | -2.59040400 | -0.67318100 |
| H | -7.27060100 | -3.83566800 | -2.82533900 |
| H | -7.25004300 | -2.09794400 | -3.13757200 |
| H | -5.80609900 | -3.06740700 | -3.44376900 |
| H | 7.76448000  | 2.92929900  | -1.41385600 |
| H | 4.50655700  | -3.44666000 | 5.19312600  |
| H | 3.97590900  | -4.55911500 | 3.92427700  |
| H | 5.46164700  | -3.61152700 | 3.71337900  |
| H | 4.10289700  | -1.49397400 | 3.67549300  |
| H | 2.62150400  | -2.43817300 | 3.88635000  |

The optimized structure of S<sub>1</sub> state of **FI-H**

|   |             |             |             |
|---|-------------|-------------|-------------|
| C | 0.92661100  | -1.18593700 | 0.89829800  |
| C | 2.28794300  | -1.21279300 | 0.70087500  |
| C | 2.96005000  | -0.09878000 | 0.13416700  |
| C | 2.16959800  | 1.02681500  | -0.22655700 |
| C | 0.79496600  | 1.01421000  | -0.00654900 |
| C | 0.12180900  | -0.06951200 | 0.56448900  |
| O | 0.15027900  | 2.14437600  | -0.39797900 |
| N | 4.30994500  | -0.07573300 | -0.06095300 |
| C | -1.30662500 | 0.00973400  | 0.74334600  |
| C | -1.95328000 | 1.19583200  | 0.34363800  |
| C | -1.18996400 | 2.25682500  | -0.23813600 |
| C | -1.76139900 | 3.44812100  | -0.66120600 |
| C | -3.12292800 | 3.67116600  | -0.52911300 |
| C | -3.91561300 | 2.63632400  | 0.06141000  |
| C | -3.33598000 | 1.44302900  | 0.48111500  |
| C | -2.85963100 | -2.01210500 | 0.70600200  |
| C | -2.04439400 | -1.09629700 | 1.40191100  |
| C | -3.55901100 | -2.99471100 | 1.41425500  |
| C | -3.44832300 | -3.09388800 | 2.79369800  |
| C | -2.63773900 | -2.19996200 | 3.48422600  |
| C | -1.94646600 | -1.21255800 | 2.79192600  |
| C | -3.74251800 | 4.95674300  | -0.98475700 |
| C | 4.99751200  | 1.03549900  | -0.72026200 |
| C | 5.42803100  | 2.14613700  | 0.25456000  |
| C | 6.18924100  | 3.26394200  | -0.46151000 |
| C | 6.62609600  | 4.37802800  | 0.49123400  |
| C | 5.16053900  | -1.17577000 | 0.38682600  |
| C | 5.30086300  | -2.29526200 | -0.66262100 |
| C | 6.21534900  | -3.41919200 | -0.17034500 |
| C | 6.37516600  | -4.53648300 | -1.20273800 |
| C | -5.31486500 | 2.82463800  | 0.22779300  |
| C | -6.50031000 | 2.98488000  | 0.36883300  |
| C | -2.93796100 | -1.97911100 | -0.78585900 |
| O | -2.10751100 | -1.46050000 | -1.50406000 |
| O | -4.02601700 | -2.60440800 | -1.25298400 |
| C | -5.44839400 | -3.42618300 | -2.99540600 |
| C | -4.16941000 | -2.67726900 | -2.69901600 |
| H | 0.44785300  | -2.05918400 | 1.32103700  |
| H | 2.83074900  | -2.10541100 | 0.96705600  |
| H | 2.59617600  | 1.91630500  | -0.66215800 |
| H | -1.11714400 | 4.20253900  | -1.09481100 |
| H | -3.96381700 | 0.68645100  | 0.92996500  |
| H | -4.18097200 | -3.69156900 | 0.87024800  |
| H | -3.99001400 | -3.86604800 | 3.32532500  |
| H | -2.54579300 | -2.26441800 | 4.56150700  |
| H | -1.32915600 | -0.50803400 | 3.33581200  |
| H | -2.99095000 | 5.62750600  | -1.39887200 |
| H | -4.50412700 | 4.77613900  | -1.74878400 |
| H | -4.24395500 | 5.46636700  | -0.15716600 |
| H | 5.88022800  | 0.61646700  | -1.20592000 |
| H | 4.36862200  | 1.43999200  | -1.51232000 |
| H | 4.54161300  | 2.55366300  | 0.74995700  |
| H | 6.05543800  | 1.71138300  | 1.03818700  |
| H | 7.06832100  | 2.84190400  | -0.95940400 |
| H | 5.55826100  | 3.68399600  | -1.25174900 |
| H | 7.16687700  | 5.16122400  | -0.04469000 |

|   |             |             |             |
|---|-------------|-------------|-------------|
| H | 5.76416300  | 4.84100500  | 0.97893300  |
| H | 7.28497600  | 3.99225600  | 1.27360500  |
| H | 6.14379600  | -0.75464800 | 0.60120400  |
| H | 4.77107800  | -1.57538700 | 1.32321900  |
| H | 4.31158600  | -2.69515200 | -0.90133700 |
| H | 5.70106300  | -1.86622000 | -1.58598100 |
| H | 7.19823500  | -3.00476900 | 0.07662700  |
| H | 5.81198200  | -3.83403600 | 0.75921300  |
| H | 7.03113800  | -5.32501400 | -0.82712200 |
| H | 5.41085700  | -4.99100600 | -1.44480800 |
| H | 6.80770800  | -4.15623200 | -2.13192000 |
| H | -7.54868200 | 3.12563700  | 0.49378700  |
| H | -5.58232200 | -3.49489800 | -4.07682300 |
| H | -5.41456700 | -4.43898700 | -2.59026100 |
| H | -6.31316800 | -2.90885700 | -2.57635500 |
| H | -4.19010800 | -1.66032400 | -3.09162300 |
| H | -3.29334600 | -3.18492300 | -3.10387300 |

The optimized structure of T<sub>1</sub> state of **FI-H**

|   |             |             |             |
|---|-------------|-------------|-------------|
| C | -0.70718500 | -1.13148200 | -0.86046400 |
| C | -2.07558200 | -1.05996600 | -0.74037700 |
| C | -2.70115300 | 0.16041700  | -0.39546100 |
| C | -1.88277400 | 1.30029000  | -0.19187300 |
| C | -0.51408400 | 1.20098200  | -0.33430600 |
| C | 0.12782500  | -0.00664400 | -0.67044200 |
| O | 0.18348300  | 2.35935800  | -0.13791400 |
| N | -4.07473900 | 0.25708200  | -0.27334500 |
| C | 1.55916000  | -0.03006900 | -0.79999900 |
| C | 2.26000800  | 1.18236700  | -0.58584400 |
| C | 1.54550200  | 2.36226900  | -0.24954200 |
| C | 2.17716000  | 3.57217000  | -0.01926100 |
| C | 3.55934200  | 3.68734300  | -0.11012200 |
| C | 4.30659200  | 2.52316000  | -0.44701300 |
| C | 3.66302900  | 1.31259600  | -0.67507500 |
| C | 2.74482500  | -2.24867400 | -0.33225300 |
| C | 2.26496000  | -1.26920000 | -1.22579000 |
| C | 3.40789200  | -3.37519400 | -0.83260600 |
| C | 3.59391800  | -3.54819300 | -2.19631700 |
| C | 3.12676800  | -2.58346600 | -3.08124600 |
| C | 2.47383900  | -1.45657600 | -2.59504300 |
| C | 4.23911600  | 5.00130500  | 0.14054400  |
| C | -4.70066600 | 1.23164700  | 0.62249000  |
| C | -5.07273600 | 0.59696100  | 1.97817400  |
| C | -5.70313700 | 1.63110800  | 2.91435000  |
| C | -6.08107400 | 1.03059400  | 4.26933000  |
| C | -4.93986400 | -0.77197700 | -0.87639500 |
| C | -6.28465100 | -0.25147700 | -1.39105000 |
| C | -7.02142700 | -1.34975300 | -2.16566600 |
| C | -8.38119500 | -0.88247900 | -2.68559600 |
| C | 5.72853000  | 2.58966900  | -0.55193500 |
| C | 6.92725800  | 2.64698000  | -0.64020800 |
| C | 2.54441000  | -2.10145300 | 1.14126300  |
| O | 1.77877800  | -1.31255700 | 1.65714100  |
| O | 3.30612400  | -2.94874700 | 1.84718200  |
| C | 4.09611400  | -3.94576500 | 3.87534300  |
| C | 3.16404200  | -2.90755700 | 3.29366000  |
| H | -0.25172100 | -2.08272600 | -1.09896100 |
| H | -2.65738100 | -1.96053900 | -0.86166900 |
| H | -2.29531700 | 2.27468500  | 0.01901000  |
| H | 1.56967600  | 4.43216300  | 0.23359000  |
| H | 4.25400900  | 0.44341900  | -0.92811900 |
| H | 3.77317200  | -4.12004700 | -0.14014600 |
| H | 4.10280900  | -4.43011600 | -2.56467000 |
| H | 3.26966900  | -2.70365400 | -4.14820300 |
| H | 2.11591800  | -0.70345800 | -3.28649500 |
| H | 3.51414600  | 5.77554800  | 0.38882600  |
| H | 4.95524200  | 4.92215800  | 0.96294300  |
| H | 4.80355300  | 5.32562600  | -0.73794000 |
| H | -4.01815900 | 2.05729200  | 0.79119300  |
| H | -5.58807100 | 1.62668900  | 0.13242900  |
| H | -5.76901200 | -0.23078300 | 1.82055800  |
| H | -4.16941900 | 0.17945900  | 2.43164400  |
| H | -5.00414700 | 2.46029000  | 3.06265500  |
| H | -6.59330700 | 2.05536300  | 2.43915900  |
| H | -6.52767100 | 1.78659100  | 4.91874500  |

|   |             |             |             |
|---|-------------|-------------|-------------|
| H | -6.80431800 | 0.21919900  | 4.15387700  |
| H | -5.20349100 | 0.62657500  | 4.78059200  |
| H | -4.39008400 | -1.20946000 | -1.70545800 |
| H | -5.10282100 | -1.55994900 | -0.13200200 |
| H | -6.91527700 | 0.08258800  | -0.56438300 |
| H | -6.11527000 | 0.60968800  | -2.04413400 |
| H | -6.40146700 | -1.68015200 | -3.00507600 |
| H | -7.15628400 | -2.22179400 | -1.51740700 |
| H | -8.88353200 | -1.68046000 | -3.23634500 |
| H | -9.03558000 | -0.58010800 | -1.86385500 |
| H | -8.27371900 | -0.02804200 | -3.35896800 |
| H | 7.98802200  | 2.69626500  | -0.71839200 |
| H | 4.01098800  | -3.93603200 | 4.96382400  |
| H | 3.84085600  | -4.94619600 | 3.52162700  |
| H | 5.13392800  | -3.73438800 | 3.61198500  |
| H | 3.41035200  | -1.90091700 | 3.63281900  |
| H | 2.12122200  | -3.10837500 | 3.54127900  |
